# Supplementary material
Source: publisher figshare collection journal article supplement (https://geolsoc.figshare.com/ndownloader/files/8917684)
Supplement: Supplementary file 1 [file 8917684]

**Table S1.** *Amino acid data on opercula of* Bithynia tentaculata *from unit 4a of channel C at Bradley Fen, Whittlesey determined following standard procedures (Hill, 1965;* *Sykes* et al*., 1995;* *Kaufman & Manley, 1998;* *Penkman, 2005; Preece & Penkman, 2005; Langford* et al*., 2007; Penkman* et al*., 2008a, 2008b, 2011, 2013)*†

| NEaar number | Sample name | Asx D/L | Glx D/L | Ser D/L | Ala D/L | Val D/L | [Ser]/[Ala] |
| --- | --- | --- | --- | --- | --- | --- | --- |
| 9516bF | BFBto493-1bF | 0.643 ± 0.001 | 0.209 ± 0.008 | 0.931 ± 0.005 | 0.275 ± 0.001 | 0.159 ± 0.001 | 0.720 ± 0.004 |
| 9516bH* | BFBto493-1bH* | 0.519 ± 0.000 | 0.131 ± 0.001 | 0.596 ± 0.012 | 0.182 ± 0.003 | 0.097 ± 0.000 | 0.609 ± 0.011 |
| 9517bF | BFBto493-2bF | 0.646 ± 0.001 | 0.194 ± 0.010 | 0.989 ± 0.001 | 0.286 ± 0.002 | 0.162 ± 0.003 | 0.699 ± 0.004 |
| 9517bH* | BFBto493-2bH* | 0.520 ± 0.000 | 0.139 ± 0.000 | 0.642 ± 0.006 | 0.191 ± 0.018 | 0.101 ± 0.000 | 0.011 ± 0.005 |
| 9518bF | BFBto493-3bF | 0.641 ± 0.001 | 0.184 ± 0.001 | 0.962 ± 0.000 | 0.265 ± 0.013 | 0.152 ± 0.002 | 0.704 ± 0.008 |
| 9518bH* | BFNto493-3bH* | 0.520 ± 0.000 | 0.137 ± 0.000 | 0.625 ± 0.003 | 0.189 ± 0.002 | 0.098 ± 0.001 | 0.576 ± 0.000 |

†Error terms represent one standard deviation about the mean for the duplicate analyses for an individual sample. Each sample was bleached (b), with the free amino acid fraction signified by ‘F’ and the total hydrolysable fraction by ‘H*’.

**References**

Hill, R.L. 1965. Hydrolysis of proteins. *Advances in Protein Chemistry,* **20**, 37–107.

Kaufman, D.S. & Manley, W.F. 1998. A new procedure for determining DL amino acid ratios in fossils using reverse phase liquid chromatography. *Quaternary Science Reviews*, **17**, 987–1000.

Langford, H.E., Bateman, M.D., Penkman, K.E.H., Boreham, S., Briant, R.M., Coope, G.R. & Keen, D.H., 2007. Age-estimate evidence for Middle–Late Pleistocene aggradation of River Nene 1st Terrace deposits at Whittlesey, eastern England. *Proceedings of the Geologists’ Association*, **118**, 283–300.

Penkman, K.E.H., 2005. *Amino acid geochronology: a closed system approach to test and refine the UK model*. Unpublished PhD thesis, University of Newcastle.

Penkman, K., Preece, R.C., Keen, D.H. & Collins, M.J. 2008a. *British Aggregates: an Improved Chronology Using Amino Acid Racemization and Degradation of Intra-Crystalline Amino Acids (IcPD).* Department Report Series 6/2008, English Heritage Research: London (available at http://services.english-heritage.org.uk/ResearchReportsPdfs/006_2008WEB.pdf).

Penkman, K.E.H., Kaufman, D.S., Maddy, D. & Collins, M.J. 2008b. Closed-system behaviour of the intra-crystalline fraction of amino acids in mollusc shells. *Quaternary Geochronology*, **3**, 2–25.

Penkman, K.E.H., Preece, R.C., Bridgland, D.R., Keen, D.H., Meijer, T., Parfitt, S.A., White, T.S. & Collins, M.J. 2011. A chronological framework for the British Quaternary based on *Bithynia* opercula. *Nature*, **476**, 446–449.

Penkman, K.E.H., Preece, R.C., Bridgland, D.R., Keen, D.H., Meijer, T., Parfitt, S.A., White, T.S. & Collins, M.J. 2013. An aminostratigraphy for the British Quaternary based on *Bithynia opercula*. *Quaternary Science Reviews*, **61**, 111–134.

Preece, R.C. & Penkman, K.E.H. 2005. New faunal analyses and amino acid dating of the Lower Palaeolithic site at East Farm, Barnham, Suffolk. *Proceedings of the Geologists’ Association*, **116**, 363–377.
